# Supplementary material for: Outcomes of Temporary Hemiepiphyseal Stapling for Correcting Genu Valgum in Children with Multiple Osteochondromas: A Single Institution Study
Source: Children (Basel). 2021 Apr 8;8(4):287. doi: 10.3390/children8040287 (PMC8068200; doi:10.3390/children8040287)
Supplement: Supplementary file 1 [file children-08-00287-s001.pdf]

**INFERIOR OUTCOMES OF TEMPORARY HEMIEPIPHYSEAL STAPLING FOR CORRECTING GENU  
VALGUM IN CHILDREN WITH MULTIPLE OSTEochondROMAS.  
A SINGLE INSTITUTION STUDY**

**Table S1.** List of radiographic parameters

| Parameter                                       | Description                                                                                                                                                                                                                                                             | Normal range                                                                                                 |
|-------------------------------------------------|-------------------------------------------------------------------------------------------------------------------------------------------------------------------------------------------------------------------------------------------------------------------------|--------------------------------------------------------------------------------------------------------------|
| Femoral length (FL)                             | Line from the top center of the femoral head to a line parallel to the distal medial and lateral condyles                                                                                                                                                               |                                                                                                              |
| Tibial length (TL)                              | Line from the center of the intercondylar eminence to the center of the tibial plafond (midpoint between the medial and lateral malleoli at distal tibia)                                                                                                               |                                                                                                              |
| Fibular length (FbL)                            | Line from the apex to the lowest end of the fibula                                                                                                                                                                                                                      |                                                                                                              |
| Mechanical axis of the lower extremity          | Line from the center of the femoral head to the center of the tibial plafond                                                                                                                                                                                            |                                                                                                              |
| Absolute Mechanical axis deviation (MAD mm)     | The perpendicular distance from the mechanical axis of the lower extremity line to the center of the knee joint, expressed in mm                                                                                                                                        | $8 \pm 7$ mm medial.<br>Genu valgus deformity was identified based on increased lateral deviation of the MAD |
| Relative Mechanical axis deviation (MAD %)      | The perpendicular distance from the mechanical axis of the lower extremity line to the center of the knee joint, expressed as a percentage to one half of the width of the tibial plateau (to eliminate the bias created by the different tibial width in each patient) |                                                                                                              |
| Femoral mechanical axis                         | Line between the center of the femoral head and the midpoint between the medial and lateral condyles                                                                                                                                                                    |                                                                                                              |
| Femoral anatomic axis                           | The mid-diaphyseal line of the femur                                                                                                                                                                                                                                    |                                                                                                              |
| Tibial mechanical axis                          | Line from the center of the knee joint to the center of the ankle plafond                                                                                                                                                                                               |                                                                                                              |
| Tibial anatomic axis                            | The mid-diaphyseal line of the tibia. It usually corresponds to the tibial mechanical axis                                                                                                                                                                              |                                                                                                              |
| Mechanical hip–knee–ankle (HKA) axis            | Angle between a line drawn from the center of the femoral head to the center of the knee joint and a line drawn from the center of the knee joint to the center of the tibial plafond. Positive values for varus knee, negative values for valgus knee                  | $1^\circ \pm 2^\circ$ varus                                                                                  |
| Mechanical lateral distal femoral angle (mLDFA) | The lateral angle formed between the lines of the mechanical femoral axis and the articular surface of the distal femur                                                                                                                                                 | $88^\circ \pm 2^\circ$                                                                                       |
| Anatomical lateral distal femoral angle (aLDFA) | The medial angle formed between the line of the mechanical tibial axis and a line tangent to the joint surface of the proximal tibial plateau                                                                                                                           | $81^\circ \pm 2^\circ$                                                                                       |
| Mechanical medial proximal tibial angle (mMPTA) | The medial angle formed between the line of the mechanical tibial axis and a line tangent to the joint surface of the proximal tibial plateau                                                                                                                           | $87^\circ \pm 2^\circ$                                                                                       |
| Anatomical medial proximal tibial angle (aMPTA) | The medial angle formed between the line of the anatomical tibial axis and a line tangent to the joint surface of the proximal tibial plateau                                                                                                                           | $87^\circ \pm 2^\circ$<br>It normally corresponds to the mMPTA.                                              |

**Table S2.** Radiographic parameters: the inter-observer reliability

| <b>Radiographic parameters</b> | <b>ICC* (95% IC)</b> |
|--------------------------------|----------------------|
| Femur length (mm)              | 1.00 (0.99 – 1.00)   |
| Tibia length (mm)              | 0.99 (0.98 – 1.00)   |
| Fibula length (mm)             | 1.00 (0.99 – 1.00)   |
| HKA (°)                        | 0.94 (0.90 – 0.96)   |
| MAD (mm)                       | 0.99 (0.98 – 1.00)   |
| MAD (%)                        | 0.99 (0.98 – 1.00)   |
| aLDFA (°)                      | 0.86 (0.77 – 0.91)   |
| mLDFA (°)                      | 0.86 (0.73 – 0.94)   |
| MPTA (°)                       | 0.89 (0.82 – 0.93)   |
| * ICC: Interclass Correlation  |                      |

**Table S3.** Modified Clavien-Dindo-Sink Complication Classification System [27-28]

| <b>Grade</b> | <b>Definition</b>                                                                                                                                                                                                                                                                            | <b>Examples</b>                                                                                                                                                                                                          |
|--------------|----------------------------------------------------------------------------------------------------------------------------------------------------------------------------------------------------------------------------------------------------------------------------------------------|--------------------------------------------------------------------------------------------------------------------------------------------------------------------------------------------------------------------------|
| <b>I</b>     | A complication that does not result in deviation from routine follow-up in the postoperative period and has minimal clinical relevance and requires minimal treatment (e.g., antiemetics, antipyretics, analgesics, diuretics, electrolytes, antibiotics, and physiotherapy) or no treatment | Fever (>37.5°) or nausea, present after surgery, but quickly resolved spontaneously or after planned pharmacological treatment                                                                                           |
| <b>II</b>    | A deviation from the normal postoperative course (including unplanned clinic/office visits) that requires outpatient treatment, either pharmacological or close monitoring as an outpatient                                                                                                  | The child needed unplanned additional drugs, physiotherapy, or exams in case of pain, neurapraxia or thrombosis                                                                                                          |
| <b>III</b>   | A complication that is treatable but requires surgical, endoscopic, or interventional radiology procedure(s), or an unplanned hospital readmission                                                                                                                                           | A hospital re-admission was necessary, when surgical reinterventions were needed like reoccurrence of osteochondromas previously excised, hypo- or over-correction, plate malposition or breakage of hardware, infection |
| <b>IVa</b>   | A complication that is life or limb-threatening, and/or requires ICU* admission, a complication with potential for permanent disability but treatable, a complication that may require organ/joint resection/replacement. No long-term disability                                            |                                                                                                                                                                                                                          |
| <b>IVb</b>   | A complication that is life or limb-threatening, and/or requires ICU admission, a complication that is not treatable, a complication that requires organ/joint resection/replacement or salvage surgery. With long-term disability                                                           |                                                                                                                                                                                                                          |
| <b>V</b>     | Death                                                                                                                                                                                                                                                                                        | Not observed in any case                                                                                                                                                                                                 |

\* ICU: Intensive Care Unit

**Table 4.** Predictors of MAD (%) and Correction velocity. Multivariable linear regression models.

|                  |                               | MAD <sup>a</sup> post-operative (%) |               |                  | Correction velocity |              |              |
|------------------|-------------------------------|-------------------------------------|---------------|------------------|---------------------|--------------|--------------|
| Predictors       |                               | Coef <sup>b</sup>                   | 95% CI        | P-value          | Coef                | 95% CI       | P-value      |
| Group            | MO                            | 10.85                               | -1.45, 23.16  | 0.083            | -0.73               | -1.38, -0.08 | <b>0.029</b> |
| Gender           | Male                          | -3.89                               | -10.16, 2.37  | 0.222            | 0.40                | 0.00, 0.80   | <b>0.048</b> |
| Age at stapling  |                               | 0.89                                | -1.93, 3.70   | 0.535            | 0.01                | -0.19, 0.20  | 0.960        |
| Height (z-score) |                               | 4.11                                | 1.59, 6.62    | <b>0.002</b>     | 0.00                | -0.23, 0.23  | 0.996        |
| Weight (z-score) |                               | -4.20                               | -9.11, 0.72   | 0.094            | 0.14                | -0.22, 0.51  | 0.433        |
| Affected side    | Right                         | -4.20                               | -9.11, 0.72   | 0.094            | -0.03               | -0.20, 0.14  | 0.745        |
| Site             | Distal femur (ref.)           | -                                   | -             | -                | -                   | -            | -            |
|                  | Proximal tibia                | 2.64                                | -4.76, 10.05  | 0.482            | -0.40               | -0.90, 0.10  | 0.112        |
|                  | Distal femur & proximal tibia | -4.28                               | -20.26, 11.69 | 0.597            | 0.79                | -0.58, 2.15  | 0.258        |
|                  | Other                         | 0.37                                | -10.64, 11.37 | 0.948            | -0.31               | -0.80, 0.18  | 0.213        |
| MAD operative, % | pre-                          | 0.41                                | 0.23, 0.58    | <b>&lt;0.001</b> | 0.02                | 0.00, 0.03   | <b>0.022</b> |
| Bilaterality     |                               | -1.84                               | -18.77, 15.09 | 0.830            | -0.10               | -1.02, 0.81  | 0.828        |

<sup>a</sup> MAD: Mechanical Axis Deviation; <sup>b</sup> Coef: adjusted mean difference, for continuous variables coefficients were reported for 1-point increase on the respective unit of measurement

**Table S5.** Adjustment comparisons between MO *versus* idiopathic cohort on post-operative MAD and correction velocity. Linear regression models.

**Comparisons between MO *versus* idiopathic cohort using a Propensity Score approach**

To adjust the comparisons between MO *versus* idiopathic cohort on HeS outcomes, we performed different analyses using a Propensity Score (PS) approach. A PS for the likelihood to have been diagnosed with MO was calculated using a logistic regression model from the following covariates: gender, Age at stapling, height z-score, weight z-score, affected side, site, bilaterality, and pre-operative MAD. Linear regression models were estimated including as a predictor the diagnostic group variable along with the PS. Besides, the PS was applied to create more balanced samples with a 1:1 ratio between MO and idiopathic children, using the nearest neighbor matching without replacement, with and without a caliper distance of 0.40 standard deviation of the PS distribution.

The analyses results, along with the estimates deriving from multivariable analyses, were reported in Table S4.

| Adjustment Method                                             | MAD <sup>a</sup> post-operative (%) |               |         | Correction velocity |              |         |
|---------------------------------------------------------------|-------------------------------------|---------------|---------|---------------------|--------------|---------|
|                                                               | Coef <sup>b</sup>                   | 95% CI        | P-value | Coef                | 95% CI       | P-value |
| Full covariate                                                | 10.66                               | -2.18, 22.29  | 0.107   | -0.71               | -1.37, -0.04 | 0.037   |
| PS <sup>c</sup> as covariate                                  | 16.09                               | 3.75, 28.42   | 0.011   | -0.81               | -1.63, 0.01  | 0.053   |
| PS Matching, nearest neighbour <sup>†</sup>                   | 14.37                               | 2.41, 26.34   | 0.020   | -0.78               | -1.25, -0.31 | 0.002   |
| PS Matching, nearest neighbour with caliper 0.40 <sup>‡</sup> | 15.96                               | -10.91, 42.83 | 0.215   | -0.87               | -1.66, -0.08 | 0.035   |

<sup>a</sup> MAD: Mechanical Axis Deviation; <sup>b</sup> Coef: adjusted mean difference, for continuous variables coefficients were reported for 1-point increase on the respective unit of measurement; <sup>c</sup> PS: Propensity Score

<sup>†</sup> N=62 (31 MO, 31 Idiopathic) for post-operative MAD analysis, N=54 (27 MO, 27 Idiopathic) for correction velocity analysis

<sup>‡</sup> N=22 (11 MO, 11 Idiopathic) for post-operative MAD analysis, N=20 (10 MO, 10 Idiopathic) for correction velocity analysis
